# Supplementary material for: Spore sensitivity to sunlight and freezing can restrict dispersal in wood-decay fungi
Source: PubMed Central journal article supplement (PMC4569028; doi:10.1002/ece3.1589), 2015-07-22

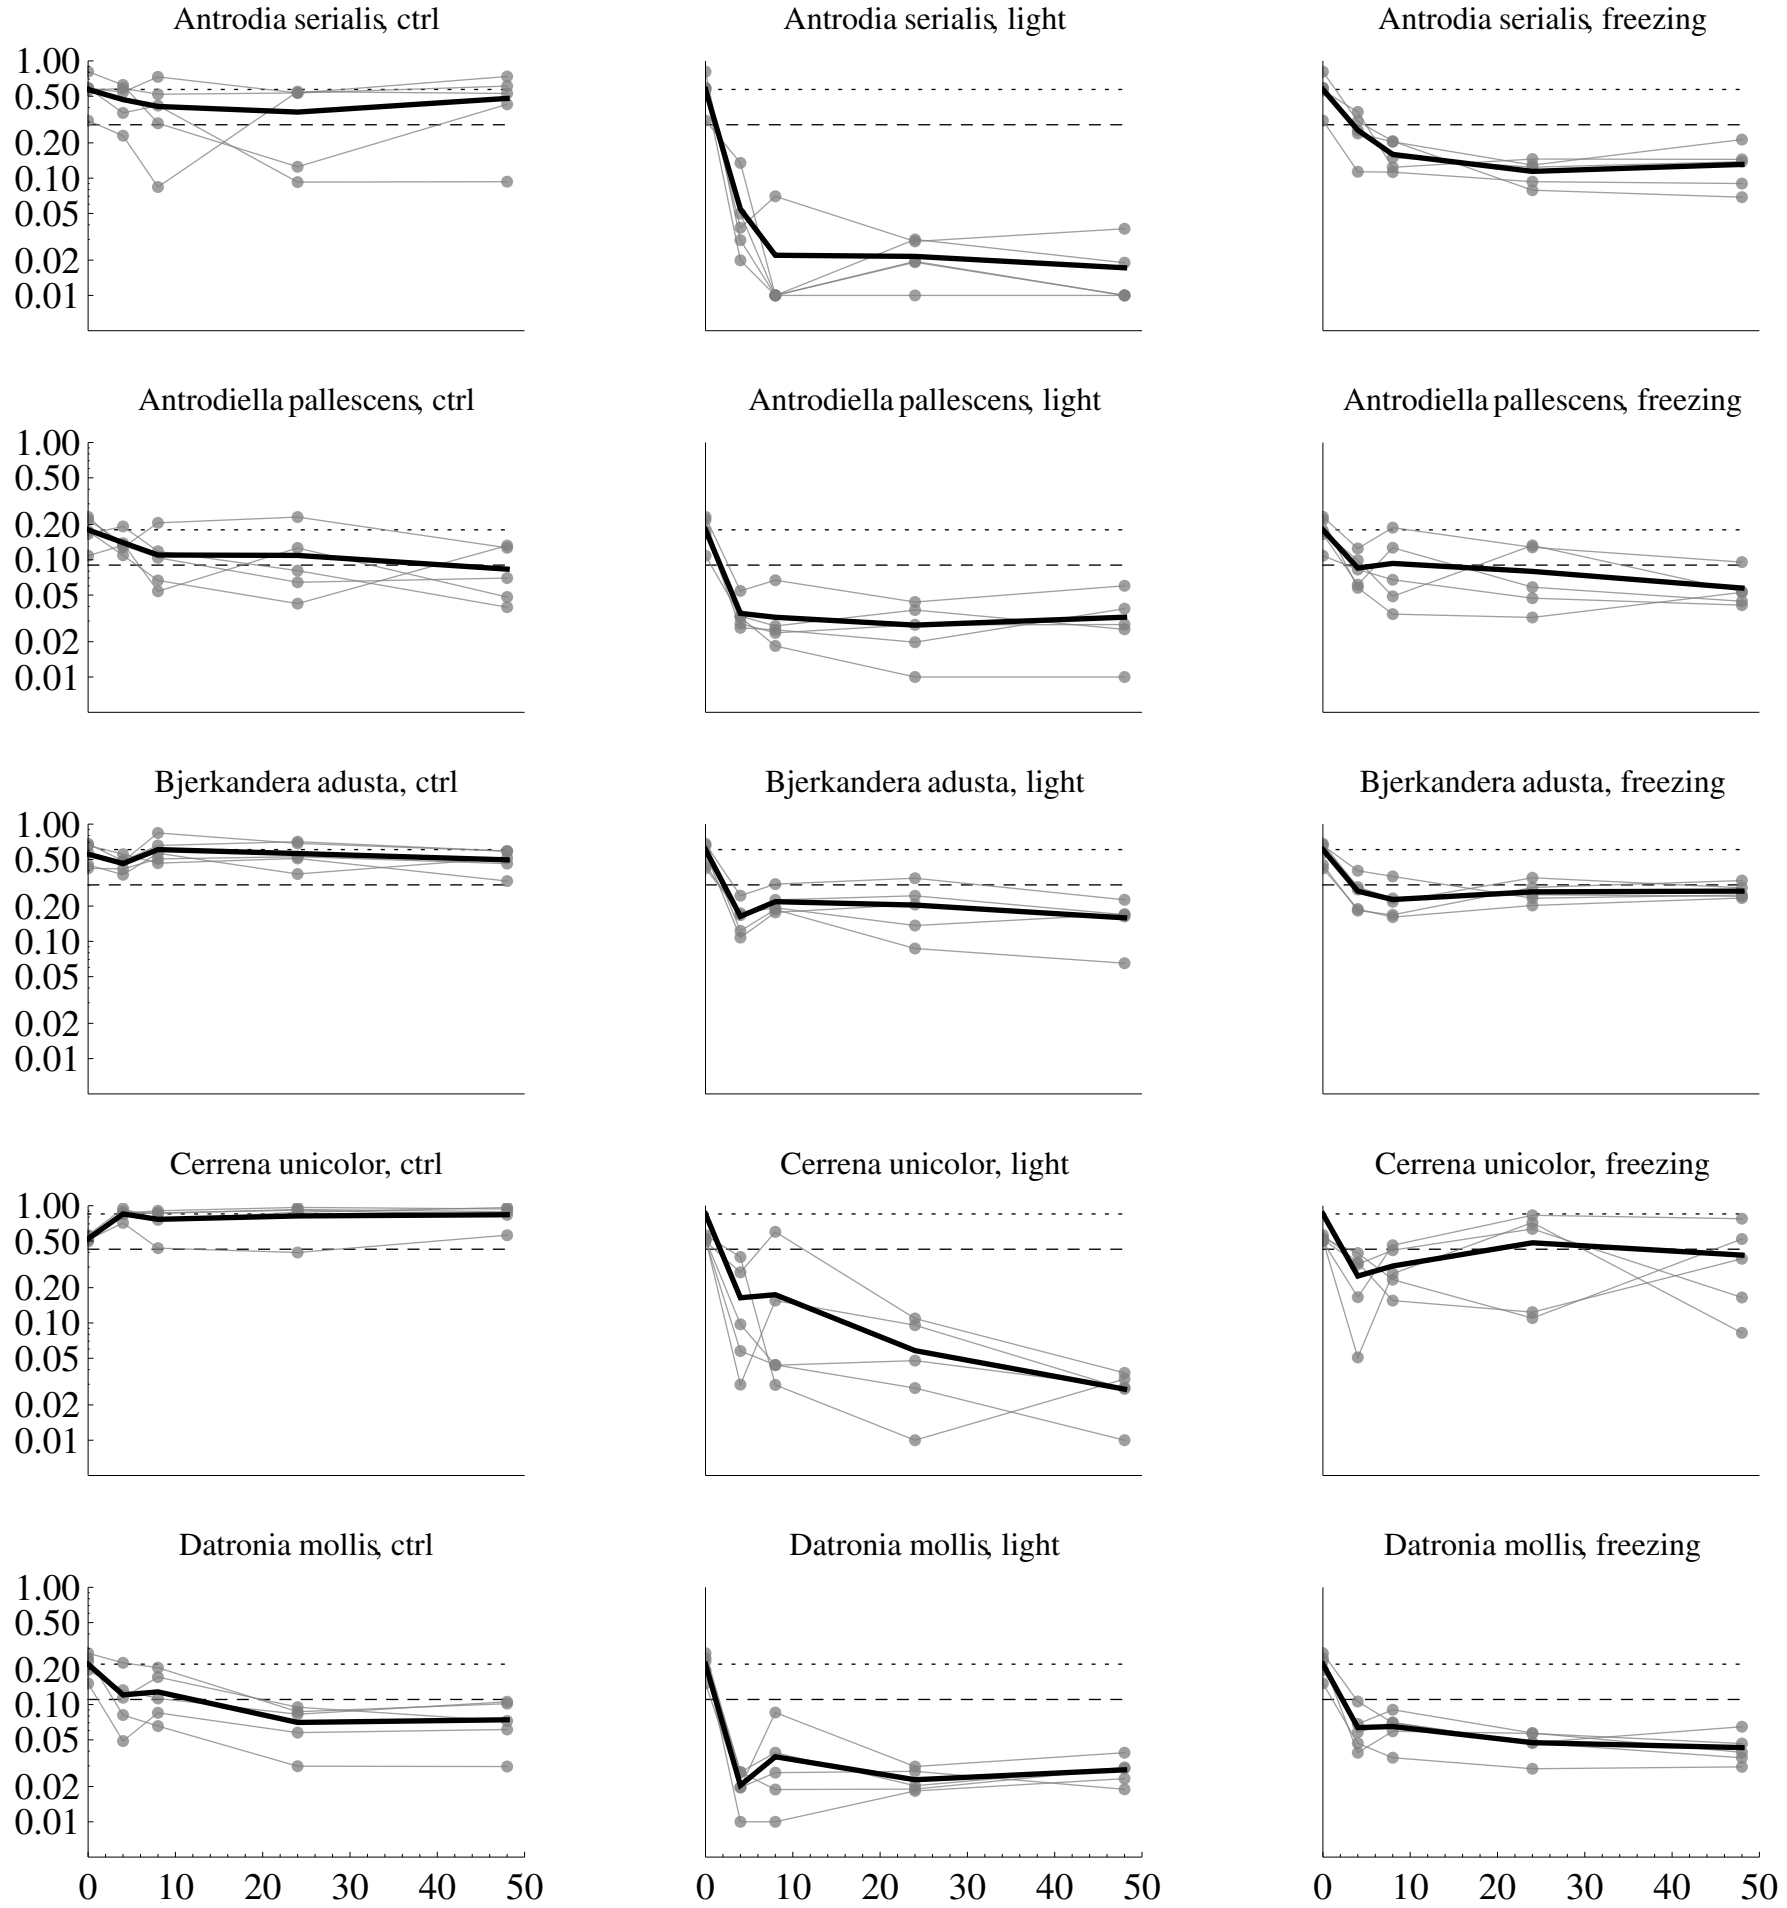

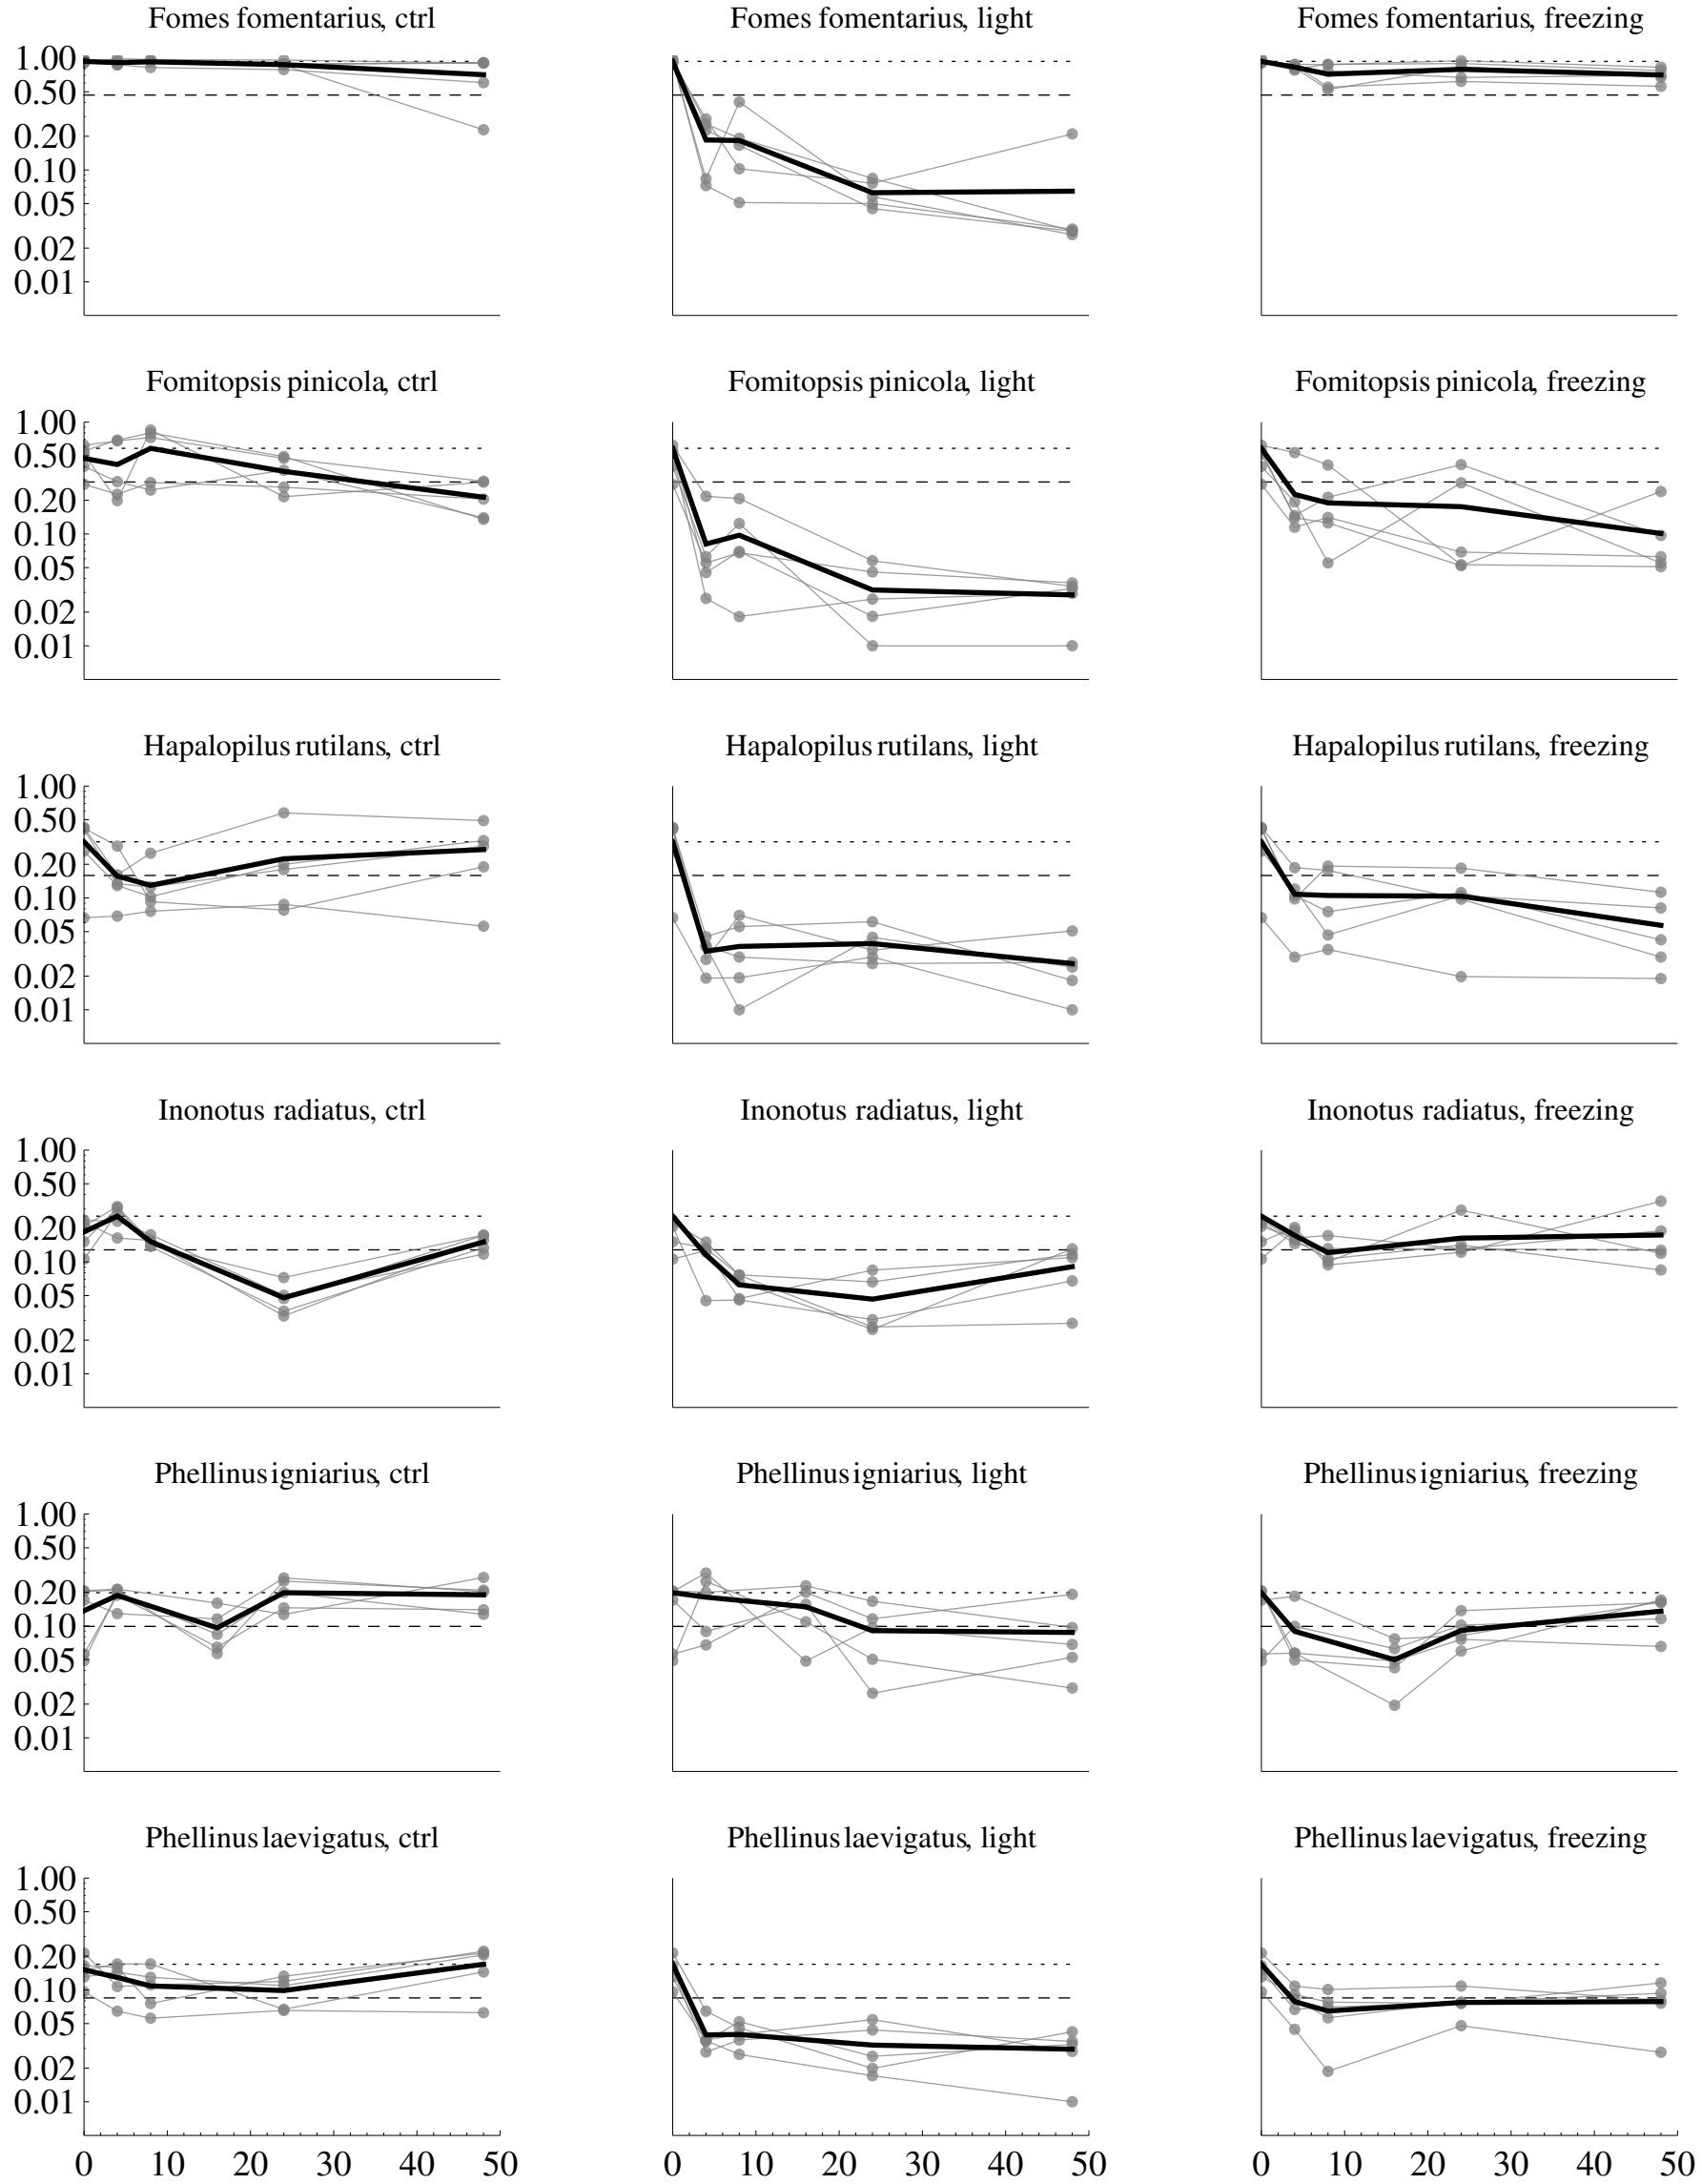

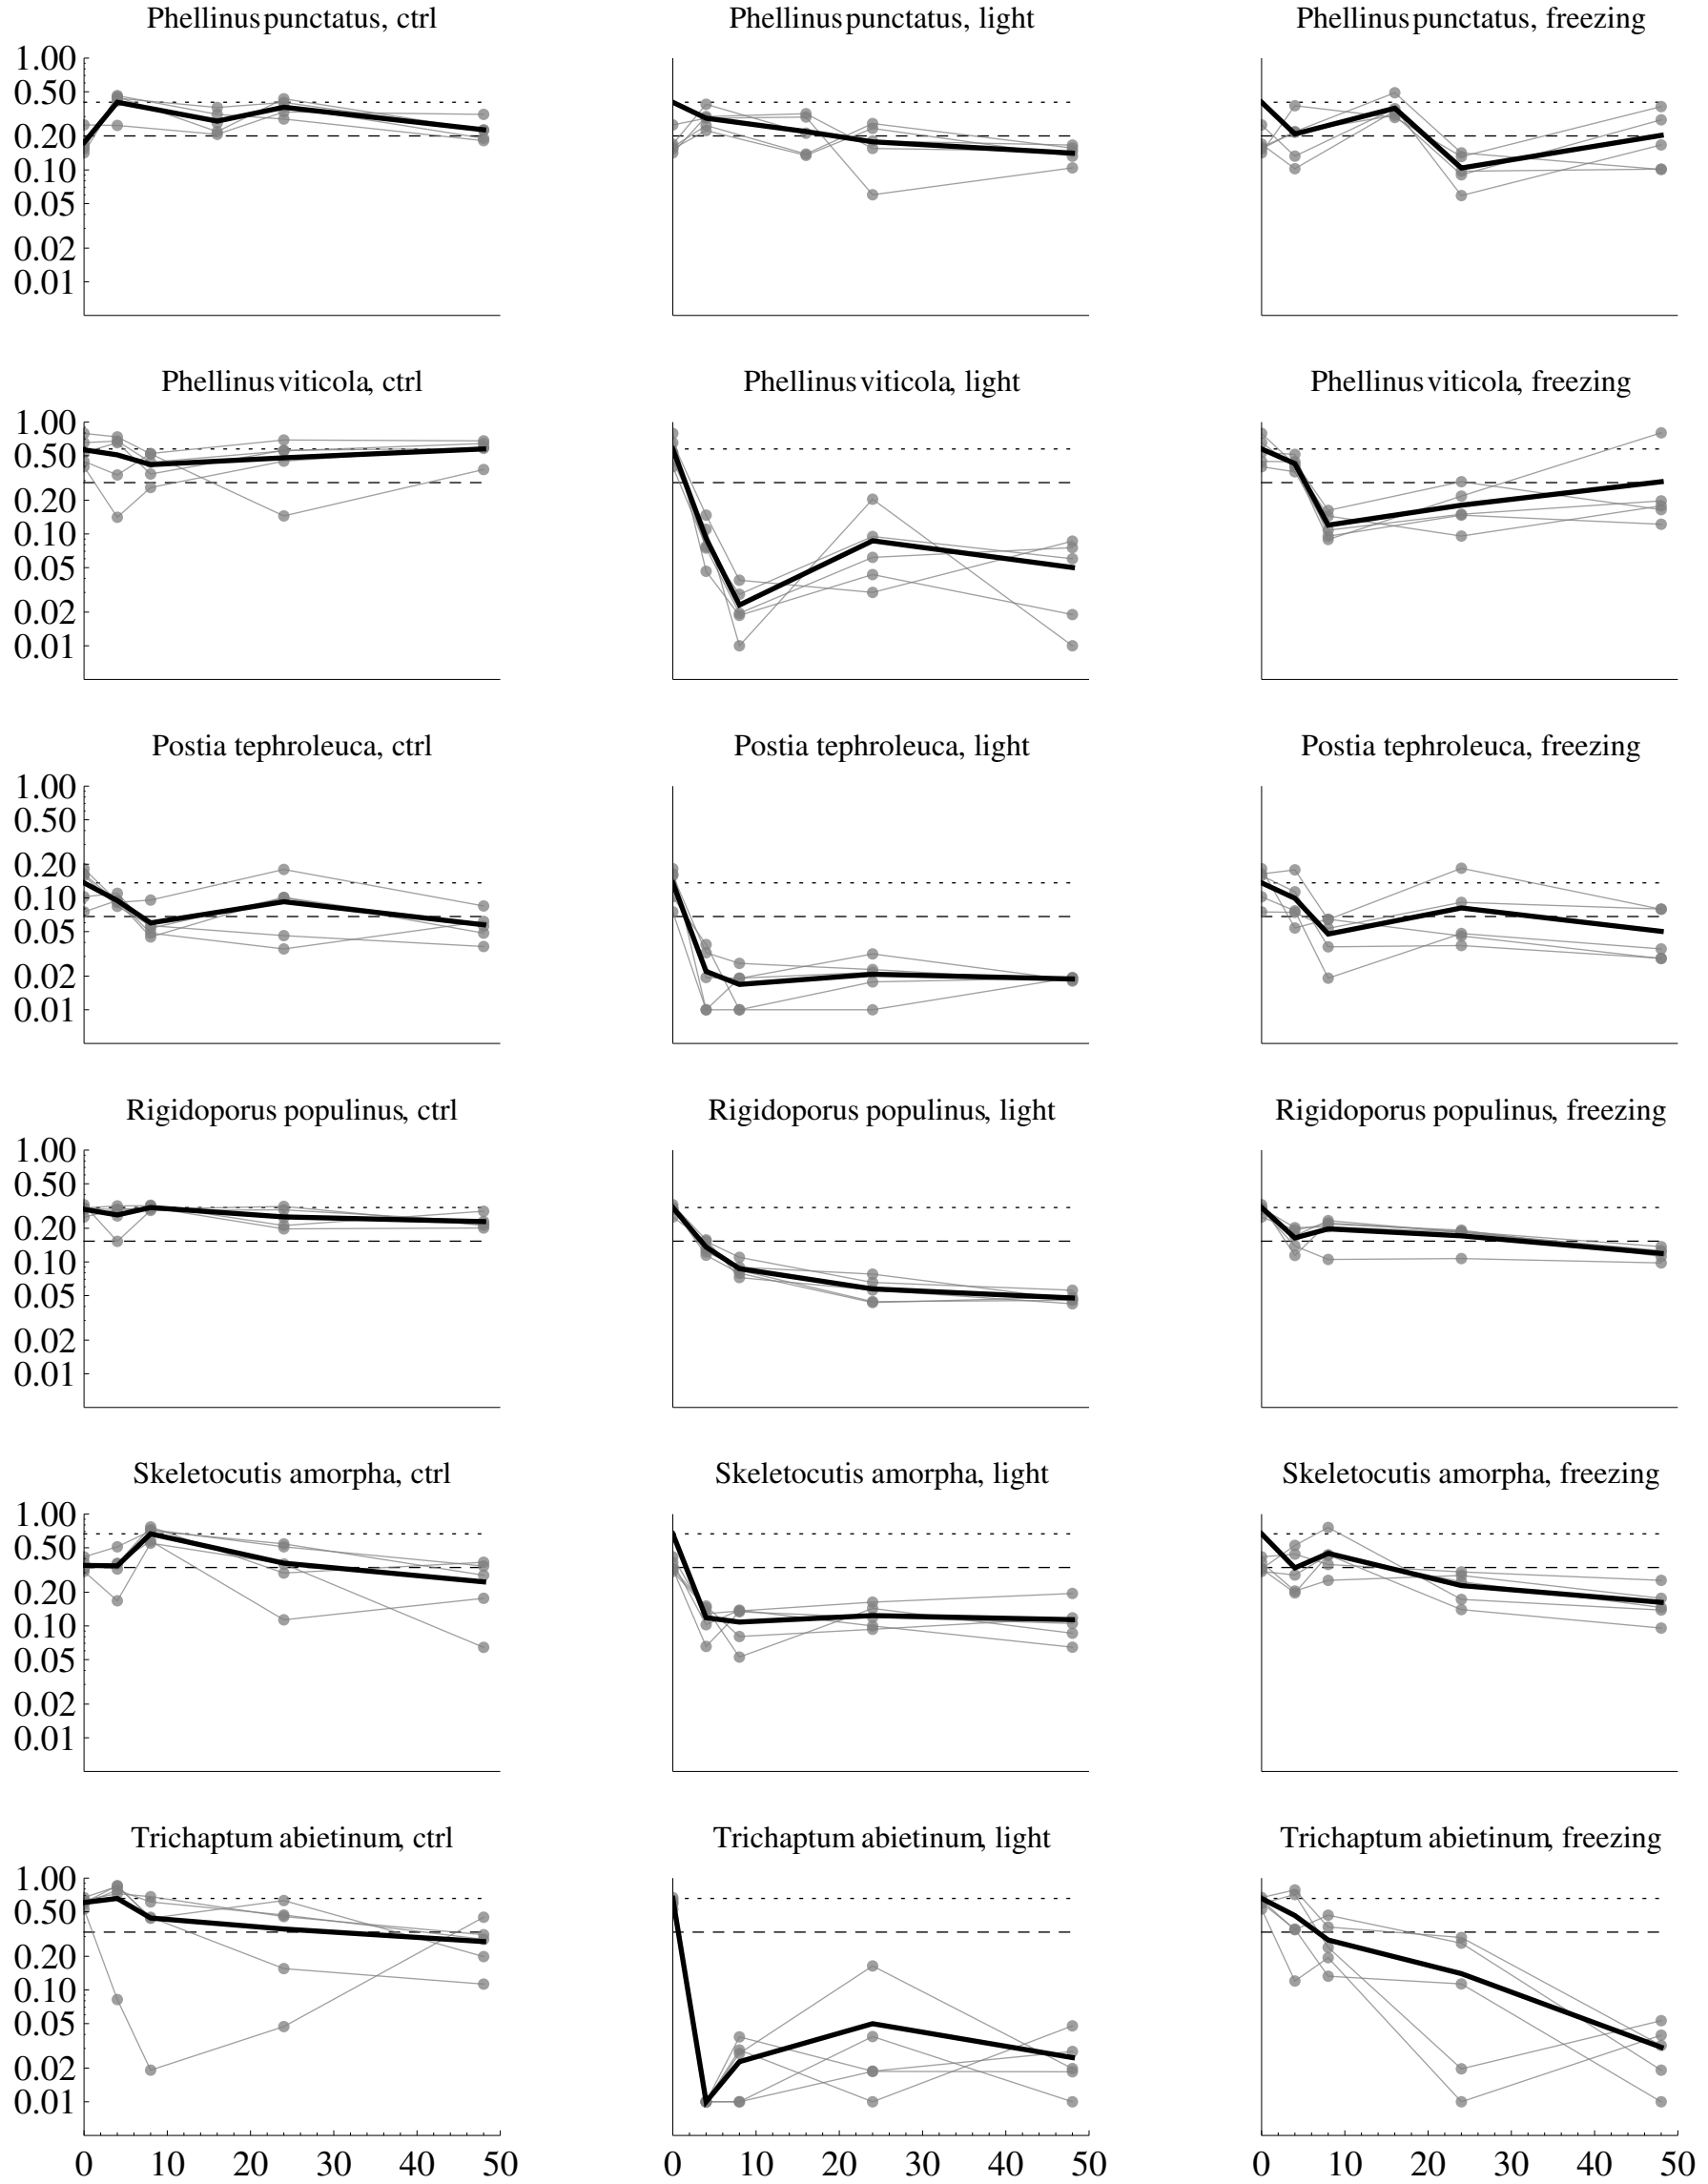

Supplement: ece30005-3312-sd3.pdf [file ece30005-3312-sd3.pdf]
